# Comparing neural language models for medical concept representation and patient trajectory prediction

Alban Bornet<sup>1,\*</sup>, Dimitrios Proios<sup>1,2</sup>, Anthony Yazdani<sup>1,2</sup>, Fernando Jaume-Santero<sup>1</sup>, Guy Haller<sup>3,4</sup>, Edward Choi<sup>5</sup>, Douglas Teodoro<sup>1,\*</sup>

<sup>1</sup> Department of Radiology and Medical Informatics, University of Geneva, Geneva, Switzerland

<sup>2</sup> Geneva School of Business Administration, HES-SO University of Applied Sciences and Arts of Western Switzerland, Geneva, Switzerland

<sup>3</sup> Department of Acute Care Medicine, Division of Anaesthesiology, Geneva University Hospitals, Switzerland.

<sup>4</sup> Department of Epidemiology and Preventive Medicine, Health Services Management and Research Unit, Monash University, Melbourne Victoria, Australia.

<sup>5</sup> KAIST, Republic of Korea

\* Corresponding authors - {alban.bornet,douglas.teodoro}@unige.ch

## Abstract

Effective representation of medical concepts is crucial for secondary analyses of electronic health records. Neural language models have shown promise in automatically deriving medical concept representations from clinical data. However, the comparative performance of different language models for creating these empirical representations, and the extent to which they encode medical semantics, has not been extensively studied. This study aims to address this gap by evaluating the effectiveness of three popular language models - word2vec, fastText, and GloVe - in creating medical concept embeddings. By using a large dataset of digital health records, we created patient trajectories and used them to train the language models. We then assessed the ability of the learned embeddings to encode semantics through an explicit comparison with biomedical terminologies, and implicitly by predicting patient outcomes and trajectories with different degrees of information. Our qualitative analysis shows that empirical clusters of embeddings learned by fastText exhibit the highest similarity with theoretical clustering patterns obtained from biomedical terminologies, with a similarity score between empirical and theoretical clusters of 0.88, 0.80, and 0.92 for diagnosis, procedures, and medication codes, respectively. Conversely, for outcome prediction, word2vec and GloVe tend to outperform fastText, with the former achieving AUROC as high as 0.80, 0.63, and 0.88 for length-of-stay, readmission, and mortality prediction, respectively. In predicting the next steps in patient trajectories, GloVe achieves the highest performance for diagnostic and medication codes (AUPRC of 0.46 and of 0.82, respectively) at the highest level of the semantic hierarchy, while fastText outperforms the other models for procedure codes (AUPRC of 0.67). Our study demonstrates that subword information is crucial for learning medical concept representations, but global embedding vectors are better suited for downstream tasks, such as trajectory prediction. Thus, these models can be harnessed to learn representations that convey clinical meaning, and our insights highlight the potential of using machine learning techniques to semantically encode medical data.

**Keywords:** neural language models, medical concept embeddings, electronic health records, patient trajectory prediction, clinical outcome prediction, biomedical terminologies, hierarchical clustering

**NOTE: This preprint reports new research that has not been certified by peer review and should not be used to guide clinical practice.**

## 1. Introduction

With the widespread adoption of electronic health record (EHR) systems in healthcare institutions, large-scale analysis of digitalized patient data for secondary usage offers great opportunities to improve clinical research and healthcare management [1–5]. It enables for example to identify patterns and trends that can be used to estimate quality of care and clinical outcomes, such as the likelihood of adverse events [6–9] or poor outcomes [10–13]. This data can also be leveraged to automatically characterize specific phenotypes, such as disease subtypes [14–17] or treatment response profiles [18, 19], and perform patient trajectory prediction [20–22], e.g., for clinical decision support [23–25] or real-time mortality prediction [26–28]. However, healthcare data is complex, heterogeneous, and significant human curation and modeling are often required to represent clinical entities and capture intricate relationships between them [29–31].

Classic approaches to abstract patient data and create homogeneous representations for secondary analyses are based on data mappings [32–35], in which raw data are encoded using concepts from biomedical knowledge organization systems [36], such as the International Classification of Diseases (ICD) [37] and the Anatomical Therapeutic Chemical (ATC) [38] classification systems, and the Systematized Nomenclature in Medicine – Clinical Terms (SNOMED-CT) ontology [39]. Despite the benefits of these approaches for representing knowledge in EHRs and the facilitated semantic interoperability, there are limitations and challenges that need to be considered. First, large human efforts are required to curate and annotate data, a resource that is often not at one’s disposal in hospitals [40–42]. Additionally, as data and information evolve, the lack of readily available and up-to-date formal representations might hinder their application to the full extent of EHR data [43]. Lastly, the resulting representations of medical concepts are highly dimensional, leading to sparse and computationally inefficient data structures (e.g., SNOMED-CT alone has more than 300’000 concepts).

In recent years, as a complementary alternative to fully semantic encoding, data-driven methods for EHR concept representation based on deep learning were proposed [44–47]. In contrast to knowledge-based approaches, deep learning algorithms learn representations of patients and clinical concepts automatically and directly from the data, with minimal pre-processing. The learnt representations are dense, low-dimensional vectors that can be used in many downstream tasks. This approach, known as medical concept embedding, has already achieved promising results (for reviews: [48–51]). For example, convolutional, long short-term memory, as well as attention-based neural networks were trained with patient data to perform various patient trajectory prediction tasks [52–55]. Moreover, similar neural network architectures were used for automated phenotyping, by building representations of structured [56–58], unstructured [59–62] EHR data, or both [63–65]. As a recent use-case scenario, deep learning methods were applied to COVID-19-related EHR data for epidemiological prediction [66], automatic diagnosis [67], drug repurposing [68–71], or mortality risk assessment [72–74].

A key aspect of developing accurate patient and medical concept embeddings lies in abstracting and modeling the relevant data features. In that respect, neural language models can process EHRs, not only for clinical notes, but also by considering events in the patient trajectory as tokens, and entire trajectories as a sequence of tokens, similar to word sentences [75–80]. Medical concepts relate to each other, either with causal relationships, e.g., diagnosis and medication, or through similar

meanings, e.g., related, or synonymous diagnoses or compounds with similar effects or indications. Analogous to text, syntactic and semantic relationships among EHR concepts can thus be learned by neural language models: leveraging this inherent data structure was shown to improve representations of medical concepts and patients [47, 81]. For example, attention-based language models were trained with sequences of clinical events and produced representations which improved performance for disease prediction [53] as well as for length-of-stay, readmission, and mortality prediction [82, 83].

Several studies compared the advantages and shortcomings of popular neural language models, such as word2vec [84], fastText [85, 86] and Global Vectors for Word Representation (GloVe) [87], to create word embeddings when applied to clinical notes [88–91]. Still, no study has yet performed such a comparison for medical concept code representations. In this work, we aim to assess the performance of neural language models to generate embeddings from patients' stays at the hospital expressed as sequences of healthcare related event codes. In previous work, using the Medical Information Mart for Intensive Care (MIMIC) IV dataset [92], we showed that embeddings produced by word2vec provide useful representations of medical concept codes [79]. In this work, we extend this study by comparing the quality of embeddings produced by word2vec, fastText and GloVe. To do so, we create patient trajectories as sequences of administrative, demographic, and clinical events using the MIMIC-IV dataset. Then, the different neural language models are trained to learn medical concept representations from these trajectories. Finally, we qualitatively evaluate the extracted representations using a clustering task (intrinsic evaluation) and quantitatively using binary and categorical trajectory prediction tasks (extrinsic evaluation). The code that we used to build patient trajectories, train the models, and evaluate them, is available on our repository<sup>1</sup>.

The contribution of this work can be summarized as follows:

1. We compare popular neural language model architectures - word2vec, fastText and GloVe - trained on patient trajectories created from sequences of medical codes and show that these language models can produce data-driven embeddings that capture the semantic meaning of medical concepts, as defined by biomedical terminologies.
2. We evaluate the alignment between medical concept embeddings and biomedical terminologies and, using a clustering algorithm, we show that fastText naturally presents the highest similarity to the different hierarchical levels of the terminologies, with a cluster similarity distance between 0.80 and 0.92 for diagnosis, procedure, and medication codes.
3. We assess patient outcome prediction at different information levels and show that after 10% of the trajectory, the extracted embeddings can estimate mortality risks with performance above 0.80 AUROC. On the other hand, using the full trajectory (i.e., 100% of patient tokens), we can estimate readmission with performance of only around 0.60 AUROC.
4. Lastly, we evaluate how much intrinsic information the learned embeddings encode to infer the next events in the patient trajectory, i.e., diagnoses, procedures, and medication. We demonstrate that while high-level information can be encoded by the embeddings, with performance varying from 0.46 AUPRC for diagnosis codes to 0.82 AUPRC for medication codes, prediction performance decay exponentially with the increase of semantic granularity.

---

<sup>1</sup> [https://github.com/ds4dh/medical\\_concept\\_representation](https://github.com/ds4dh/medical_concept_representation)

## 2. Methodology

### 2.1 MIMIC-IV dataset and pre-processing steps

We extracted 431,231 hospital stays from the 299,712 patients present in the MIMIC-IV database [92]. MIMIC-IV is a large, openly available dataset of de-identified EHRs from patients admitted to intensive care units (ICUs) or to the emergency department at Beth Israel Deaconess Medical Center in Boston between 2008 and 2019. The dataset contains comprehensive clinical data, including vital signs, laboratory results, medications, procedures, and diagnoses, as well as demographic information such as age, gender, and race. All entries in MIMIC-IV are associated with a patient and an admission identifier, and most of them are (directly or indirectly) labeled with a timestamp. This allowed us to assemble sequences of events occurring during patients' hospital stays. Each patient may be admitted several times at the hospital, and for each sequence of events happening between admission and discharge time, we computed one sequence of events, which will be referred to as "*patient trajectory*" from now on. Each event was extracted from MIMIC-IV tables as a token which could encode a label associated with the patient demographic, administrative information, or a medical event (Figure 1). We provide a detailed description of each token category in the supplementary information (Appendix A1).

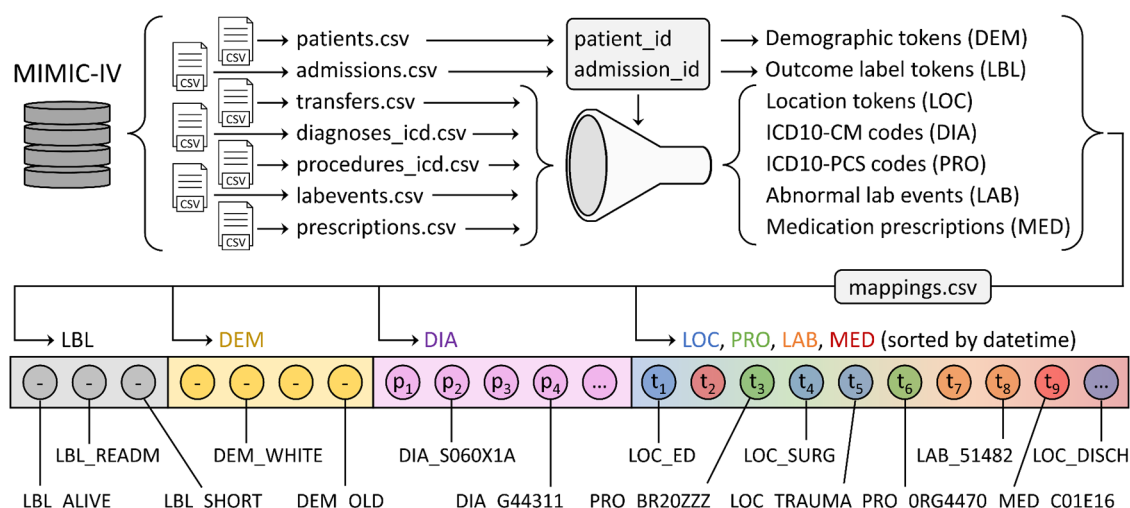

**Figure 1. Patient trajectory sequence generation.** Medical data was extracted from the MIMIC-IV database. Patient and admission ids were used to parse the data and obtain one sequence per patient trajectory. Outcome labels and demographic tokens were built using patient and admission data. Token sequences were built from the MIMIC tables, using mappings from MIMIC or custom mappings. Tokens for location, procedures, abnormal lab events and medication prescriptions were sorted by datetime. Outcomes, demographic information, and ICD10-CM codes were prepended to the sequence, because they do not have any associated datetime. ICD10-CM codes were sorted by priority.

As shown in Figure 1, patient trajectories were built by concatenating the tokens from the outcome (LBL), demographic (DEM), diagnosis (DIA), administrative (LOC), procedures (PROC), laboratory (LAB) and medication (MED) categories. The outcome and demographic tokens started each sequence, and diagnosis codes came second, as a reason for intensive care hospitalization. The remaining tokens were appended to the sequence, after being sorted altogether by their associated datetimes (Figure 1). The different token categories extracted from the MIMIC database are summarized in Table 1.

| Category | Content                          | Encoding  | Token instances (#) | Tokens per sequence (#) |
|----------|----------------------------------|-----------|---------------------|-------------------------|
| LBL      | Labels for binary classification | Custom    | 6                   | 3.00 ± 0.00             |
| DEM      | Gender, age, race                | Custom    | 37                  | 3.28 ± 0.45             |
| DIA      | Diagnoses and reason for visits  | ICD10-CM  | 9774                | 11.01 ± 7.29            |
| LOC      | Care unit locations              | Custom    | 28                  | 5.22 ± 2.99             |
| PRO      | Procedures                       | ICD10-PCS | 4243                | 1.53 ± 2.40             |
| LAB      | Lab results outside normal range | Ids       | 398                 | 49.39 ± 127.99          |
| MED      | Medication prescriptions         | ATC       | 1122                | 31.57 ± 41.34           |

**Table 1. Summary of the tokens used to build patient trajectory sequences.** The number of tokens per sequence indicates the mean and the standard deviation, which were computed from the training dataset. Note that, in MIMIC-IV, all medications are stored as Generic Sequence Number (GSN) or National Drug Code (NDC) entries. We mapped these entries to their Anatomical Therapeutic Chemical (ATC) code equivalents, by using the work of Kury et al. [93], which queries the online RxNorm API [94] automatically. ATC codes are hierarchically arranged following the target anatomical system of medications, as well as their therapeutic, pharmacological, and chemical effects. Appendix A1 describes in detail how we built the mapping, which we make available in our repository<sup>2</sup>.

Once all sequences were constructed, the dataset was split into training, validation and testing subsets, containing 345.3k, 43.5k, and 42.4k patient trajectory sequences, respectively. The splitting was based on patient ids (80% for training, 10% for validation, 10% for testing) and not admission ids, which explains the different number of samples for the validation and testing sets. This means that for any patient, all patient trajectories were included in the same data subset. This avoided patient information leaking from the training data to the validation and testing data.

## 2.2 Training language models

We trained three language models - word2vec [84], fastText [85, 86], and GloVe [87] - to compute medical concept embeddings for any token appearing in the patient trajectory sequences. Patient trajectory sequences were encoded by a vocabulary that assigned an integer id to any token appearing at least 5 times in the training data and a special id for the remaining “unknown” tokens. Each model mapped these ids to fixed-size float vectors, i.e., embeddings, initialized with a random floating point look-up table. We used an embedding dimensionality of 512 for all models. These embeddings were trained by optimizing the different model’s objectives, in order to provide useful representations of medical concepts (Figure 2, top).

---

<sup>2</sup> [https://github.com/ds4dh/medical\\_concept\\_representation/tree/main/data/datasets/mimic-iv-2.2/maps](https://github.com/ds4dh/medical_concept_representation/tree/main/data/datasets/mimic-iv-2.2/maps)

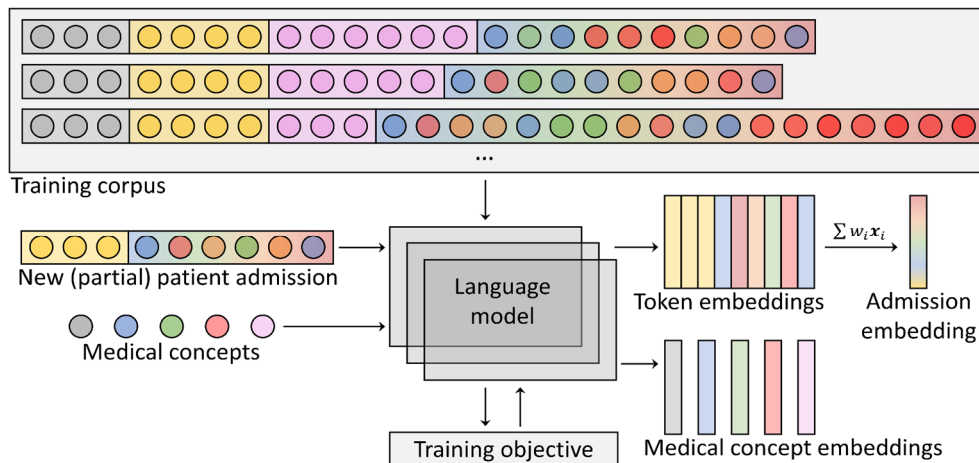

**Figure 2. Training and evaluation of language models.** Language models (word2vec, fastText or GloVe) were trained, based on their respective objectives (see sections 2.2.1 to 2.2.3 for details), using patient trajectories from the training dataset. After training, embeddings of patient trajectories or single medical concepts were queried using the hidden weights of the models. To generate a single embedding vector for a patient trajectory, token embeddings were averaged, weighting each token by the inverse of its frequency in the training dataset.

We trained all models until convergence - 100'000 training steps for word2vec and fastText, and 300'000 for GloVe - with a batch size of 4096 tokens. After training, any medical concept could be given as input to the language model to obtain a vector representation (Figure 2, bottom). To embed any patient trajectory, we computed a weighted average of the embeddings of its tokens (Figure 2, bottom-right). The weights were defined as the inverse token frequencies in the training dataset. The neural language models used in our experiments are described in sections 2.2.1 to 2.2.3.

### 2.2.1 Word2vec

Word2vec [84] is a 2-layer neural network whose goal is to represent tokens by the context in which they appear. We used the skip-gram architecture of word2vec, which receives single tokens as input and embeds them to predict nearby target tokens. The reason is that skip-gram works better with small datasets and has better representations of rare tokens [95]. Training samples were built from patient trajectory sequences by collecting all tokens that appear in a fixed-size context window and assigning them to the token in the center of the window. For our case, the context window extended over 5 tokens on both sides. During training, the model updates its parameters by maximizing the likelihood of predicting the context tokens given the corresponding input tokens. This is achieved by applying the softmax function to the dot product of the input token embedding and all possible token embeddings, which produces a probability distribution of the target context token over the vocabulary. After training, tokens that appear in similar contexts are expected to be close to each other in the embedding space, enabling word2vec to capture meaningful relationships between medical concepts.

### 2.2.2 FastText

FastText [85, 86] is a neural network that extends the word2vec model by representing words as bags of character n-grams, capturing subword information. FastText can represent unseen words based on their subword units. The architecture and training schedule of fastText is similar to word2vec. The main difference is that, before being processed further, a token embedding is computed as the sum of the

embeddings of its n-grams. The motivation to use fastText in our case is that codes from biomedical terminologies tend to be structured in a hierarchical manner (e.g., ICD10-CM, ICD-PCS, ATC). Subword information may hence automatically include this hierarchy in the token representations. To add subword information to the medical concept tokens, we used n-grams for  $2 \leq n \leq 5$ .

### 2.2.3 GloVe

GloVe [87] is a count-based algorithm that captures global word co-occurrence statistics. It constructs a co-occurrence matrix by counting how frequently words co-occur in the sequences of the dataset and then factorizes the matrix to obtain word embeddings. Unlike word2vec and fastText, GloVe considers the entire co-occurrence matrix during training, rather than focusing on local context windows around each word. In principle, this allows GloVe to capture more complex semantic and syntactic relationships between words that may be separated by several words or even sentences. In our experiments, to create the co-occurrence matrix we counted, for each pair of tokens, how many times they appeared in a common patient trajectory sequence of the training dataset. Empirically, this approach led to better performance than using a fixed-size context window to compute co-occurrences. During training, the model embedded token pairs to predict their co-occurrence score.

### 2.2.4 Creating training sequences

For fastText and word2vec, we followed the procedure of reference [79] to create the training sequences. The procedure shuffled the content of patient trajectory sequences when building center-context token pairs, which resulted in better predictive performance. The reason was that tokens prepended to the sequence, e.g., demographics, were otherwise almost never part of other tokens' context windows. In the current work, to preserve local relationships among tokens in the learned representations, we shuffled each sequence only with 50% probability. We also ran an alternative training schedule, where no shuffling was applied, but all context windows artificially included the outcome tokens, demographic information, as well as the 3 most important diagnosis codes, in addition to the normal context tokens. However, this alternative training procedure produced very small and inconsistent improvements. For GloVe, as the co-occurrence matrix is created using the whole trajectory (i.e., window size equals to the trajectory length), we used the original trajectory sequence.

## 2.3 Visualization of medical concept embeddings

We visualized the embeddings of different medical concepts present in the MIMIC-IV dataset, as computed by the different language models described in section 2.2. More specifically, using the t-SNE algorithm [96], we generated a 2-dimensional representation of the embeddings of all ICD10-CM (diagnoses and reason for visits), ICD10-PCS (procedures) and ATC (medication) codes appearing in the model's vocabulary. We used the python package scikit-learn [97] to implement the t-SNE algorithm, with the following hyper-parameters: perplexity = 30.0, learning\_rate = auto, metric = cosine, init = pca, n\_iter: 10000, and n\_iter\_without\_progress = 1000.

To evaluate the capacity of each model's embeddings to capture the semantic meaning of medical concepts, we labeled the codes with the main terminological subcategories to which they belong. Our expectations were that trained embedding would form clusters of medical concepts that correspond to

these subcategories. For ICD10-CM codes, we used the ICD10 chapter indices<sup>3</sup>, which mainly correspond to the first letter of the code, and encode the general type of injury or disease, e.g., G (*nervous*), I (*circulatory*), or J (*respiratory*). For ATC codes we used the first letter as well, which indicates the main anatomical group that the medication is intended to act upon, e.g., C (*cardiovascular system*), and D (*dermatologicals*). For ICD10-PCS codes, although the first character indicates the general category of the procedure, e.g., 7 (*osteopathic*) or B (*imaging*), most entries start with the character 0 (*medical and surgical procedures*). For this reason, in addition to first-letter subcategories, we split subcategory 0 using the second character, which stands for the body system or general anatomical region involved in the procedure, e.g., OD (*medical and surgical procedures, gastrointestinal system*) or OT (*medical and surgical procedures, urinary system*). Note that we only kept subcategories that, on the one hand, held at least 1% of the codes in the terminology and, on the other hand, represented at least 1% of the tokens of the training dataset. More details about all subcategories are available in Table S3, (Suppl. Inf.).

## 2.4 Prediction tasks

We extrinsically evaluated the quality of embeddings produced by the trained models (see section 2.2) with two types of patient trajectory prediction tasks (Figure 3, left): binary and multi-label. For the binary task, the aim was to predict the outcome of a stay, namely length-of-stay (normal or extended), readmission, and mortality. For the multi-label task, the aim was to predict the next clinical events in the patient trajectory, namely diagnoses or reason for visits (ICD10-CM), procedures (ICD10-PCS), and medications (ATC). Importantly, no model supervision was involved, i.e., predictions were solely based on the cosine-similarity between embeddings of patient trajectories and potential target token (Figure 3, right). More specifically, for each task, we assigned a score to any code belonging to the relevant category, i.e., the outcome labels for the binary prediction task, and all codes of the specific category (ICD10-CM, ICD10-PCS, ATC) for the multi-label prediction task. The score was defined as 1.0 minus the cosine-similarity, which we used to compute the receiver operating characteristic and the precision-recall curves for any combination of task and model. To feature a realistic prediction scenario, model inputs included only a fraction of the medical concept tokens of each patient trajectory sequence. Starting from demographics tokens, we gradually increased the proportion of medical tokens given to the model (i.e.,  $P = 0.0, 0.1, 0.3, 0.6, 1.0$ ). We give more details about each prediction task in sections 2.4.1 and 2.4.2.

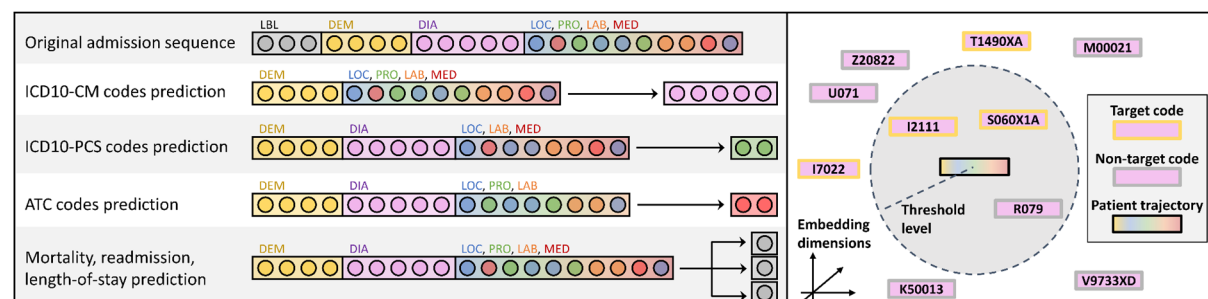

**Figure 3. Prediction tasks performed by the models. Left.** Patient trajectory sequences from the testing dataset were embedded by the trained language models. Task-specific target tokens were removed from the input sequences embedded by the models. Label tokens (used for the binary prediction tasks) were also removed for any prediction task. **Right.** For each

<sup>3</sup> <https://icd.who.int/browse10/2010/en>



predicted category, patient trajectory embeddings were compared to embeddings of any code belonging to that category (ICD10-CM codes in the figure example). Model predictions were computed as the set of medical concept tokens that are within a threshold level of dissimilarity from the patient trajectory embedding (note that, for illustration purpose, the figure depicts a threshold Euclidean distance, but we actually used 1.0 minus cosine-similarity). Predicted target tokens within threshold level correspond to true positives and predicted non-target tokens to false positives. Target tokens outside threshold level correspond to false negatives. Based on these numbers, precision-recall and ROC curves were computed using different thresholds.

#### 2.4.1 Length-of-stay, readmission, and mortality prediction

In these tasks, single label tokens for length-of-stay, readmission, and mortality were predicted by the model, based on patient trajectory embeddings. Each label token had two possible statuses: *normal* and *extended* for length-of-stay; *no-readmission* and *readmitted* for readmission; *alive* and *dead* for mortality. During training, these tokens were added at the beginning of the patient trajectory sequences and, hence, models learned to represent these tokens in relation to other medical concepts. During evaluation, these tokens were removed from the trajectory sequence (Figure 3, left). The prediction of the model was then simply computed as the outcome token whose embedding is closer to the patient trajectory embedding in terms of cosine-similarity (Figure 3, right). For each task, we evaluated model prediction performance with the areas under the receiver operating characteristic (AUROC) and the precision-recall (AUPRC) curves.

#### 2.4.2 Prediction of diagnoses and reasons for visits, procedures, and medications

In these tasks, diagnosis, and reason for visit (ICD10-CM), procedure (ICD10-PCS) and medication (ATC) codes were predicted by the model based on patient trajectory embeddings. For each task, the tokens belonging to the category of tokens being predicted were removed from the input sentence and set as target tokens (see Figure 3, left). Outcome tokens, i.e., length-of-stay, readmission, and mortality, were also removed from the input. Cosine-similarity was then computed between the embedding of the input sequence and any potential target token. These tasks are particularly challenging. For example, when predicting ICD10-CM codes, the model must correctly guess, on average, 11 tokens, any of which comes from a set of 10k possible values. We evaluated model prediction performance for different levels of lenience. First, we considered a model prediction as a hit by requiring an exact match between predicted and target tokens. Then, we only asked for a lenient match, i.e., having N letters in common with at least one of the target tokens, for N = 1, 2, 3, and 4. Finally, precision, recall, and AUPRC were computed for each level of lenience.

### 3. Results

#### 3.1 Qualitative visualization of medical concept embeddings

##### 3.1.1 Comparison to ICD10-CM, ICD10-PCS, ATC terminologies

Figure 5 shows the output of the t-SNE algorithm using embeddings obtained by the word2vec, fastText, and GloVe models for the ICD10-CM, ICD10-PCS, and ATC codes. Note that for ICD10-CM codes we did not visualize the subcategory R, since it stands for “symptoms, signs and abnormal clinical and laboratory findings, not elsewhere classified”, which we deemed too heterogeneous to have any chance to form a cluster. Moreover, we separated the subcategory “injury, poisoning and certain other consequences of external causes” into two, i.e., S and T (instead of keeping them together).

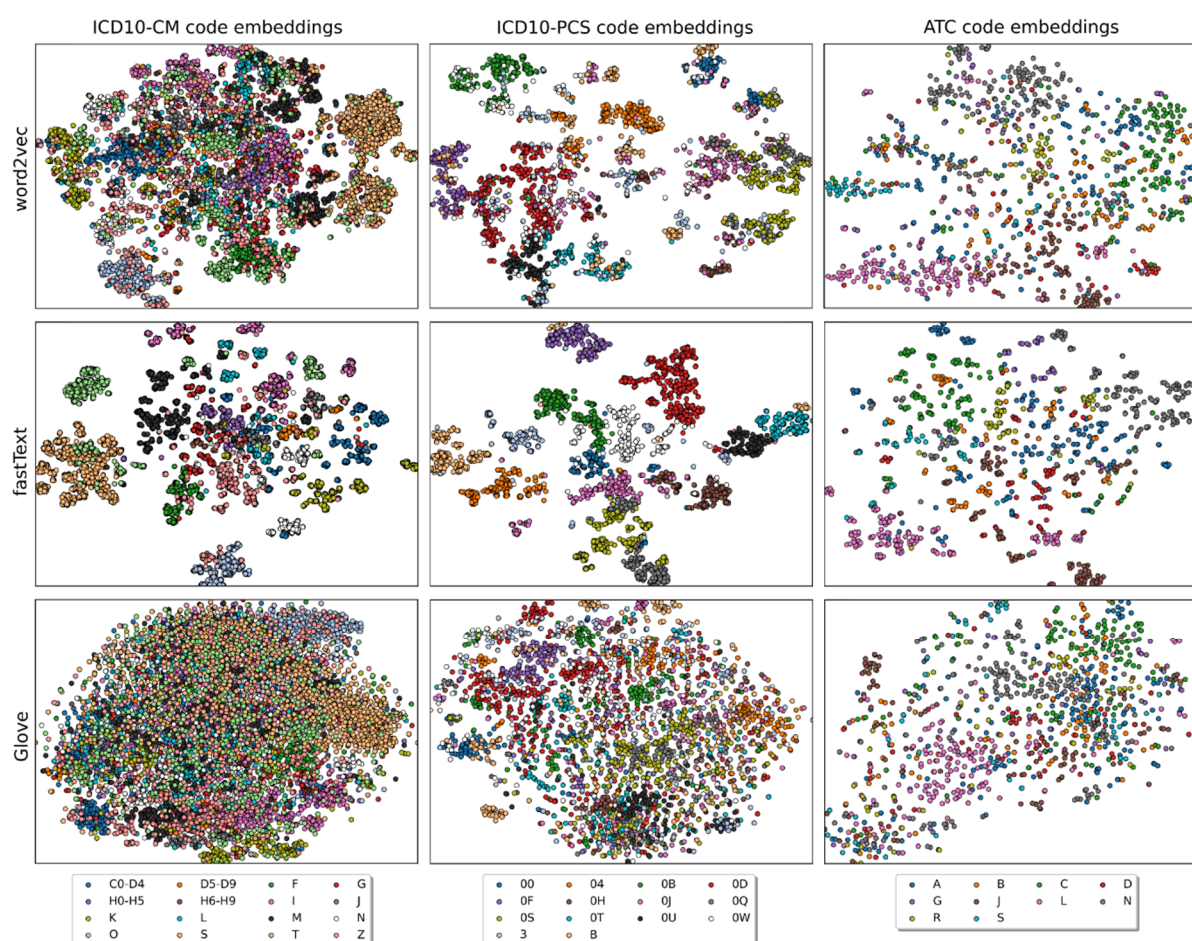

**Figure 4. Medical concept embeddings obtained after training the language models.** We used the t-SNE algorithm to reduce the dimensionality of embeddings ( $d = 2$ ). Colors represent the main subcategories of ICD10-CM, ICD10-PCS, and ATC codes (for details, see section 2.3 and Table S3, Suppl. Inf.).

Amongst all models, fastText provides embeddings whose t-SNE visualization forms the most separate clusters. Moreover, embedding clusters are visually aligned with the subcategories that are defined in section 2.1, denoted by the different colors in Figure 4. Since the t-SNE algorithm preserves local distance relationships between data samples, this suggests that semantic relationships between medical codes are part of the low-level structure of fastText embeddings. For ICD10-CM codes, the

subcategories whose fastText embeddings are the most spread out and undefined are G (*diseases of the nervous system*), L (*diseases of the skin and subcutaneous tissue*), and H6-H9 (*diseases of the ear and mastoid process*). Some codes have a substructure within subcategories, e.g., N (*diseases of the genitourinary system*) which presents two subclusters that, upon further inspection, separate conditions related to male and female genital organs. Other subcategories are mixed but are still part of well-defined clusters. For example, ICD10-CM tokens of subcategories S and T (*injury, poisoning and certain other consequences of external causes*) are separated into one cluster made only of T-tokens, and another one that mixes S and T tokens. Upon closer examination, the cluster composed of both subcategories corresponds to injuries made to an external body part (i.e., fractures, burnings, frostbites, etc., included in ICD10-CM codes that start with S00 to T34 and T66 to T88), while the other cluster corresponds to internal causes of harm (toxic substance effects, poisoning, etc., included in ICD10-CM codes that start with T36 to T65). This suggests that, even though subword information (in this case, the first letter of ICD10-CM codes) acts as prior knowledge during training in the case of fastText, data-driven statistics are smoothly integrated into the medical embedding representation of the trained model. In general, fastText embeddings of all subcategories tend to have an inner substructure. To compare these substructures to the second hierarchical level of terminologies, we also performed a clustering analysis of fastText embeddings, focusing on a specific set of subcategories (see section 3.1.2). Word2vec produces embeddings that are significantly more mixed between subcategories, especially for ICD10-CM codes. For example, subcategory T, which forms well defined clusters with fastText, spreads across the entire representation space. For ICD10-PCS codes, embeddings are more aligned with subcategories, but not as much as using fastText. For example, subcategories 0H, 0J, 0Q, 0S (standing for *medical and surgical procedures performed on the skin, subcutaneous tissues, bones, and joints*, respectively), are found to be mixed with each other, whereas they form distinct clusters with fastText. Another example is the subcategory 0W (*Medical and Surgical Body Systems - Anatomical Regions, General*), for which tokens are completely shattered when provided by word2vec, which is not the case for fastText. Finally, GloVe embeddings are the ones that are the most mixed between subcategories after t-SNE reduction.

To quantify the quality of the embeddings learned by the models, we computed rate reduction [98, 99] for any combination of model representation and medical concept category. Rate reduction is the difference between the rate distortion of the whole dataset and the mean rate distortion of each class considered separately (e.g., all ICD10-CM codes as represented by fastText vs. all subcategories of ICD10-CM codes). Rate distortion quantifies the number of bits needed to encode any representation. A reduction in rate distortion indicates that the learned representation effectively distinguishes between different classes, as the amount of information required to represent the data is reduced when the class structure is considered as a prior. Table 2 shows rate reduction for any combination of model and category using the full dimensionality of the embeddings or the output of the t-SNE algorithm (i.e., a 2-dimensional representation).

|                          |           | word2vec | fastText    | GloVe       |
|--------------------------|-----------|----------|-------------|-------------|
| Raw embeddings (d = 512) | ICD10-CM  | 410      | <b>531</b>  | 403         |
|                          | ICD10-PCS | 1387     | 1245        | <b>1463</b> |
|                          | ATC       | 1804     | 1504        | <b>1833</b> |
| <hr/>                    |           |          |             |             |
| Reduced embeddings       | ICD10-CM  | 0.38     | <b>0.72</b> | 0.11        |
|                          | ICD10-PCS | 0.47     | <b>1.20</b> | 0.09        |

|                |     |      |             |      |
|----------------|-----|------|-------------|------|
| (t-SNE, d = 2) | ATC | 0.21 | <b>0.30</b> | 0.07 |
|----------------|-----|------|-------------|------|

**Table 2. Rate reduction of medical concept representations.** Higher values mean better representations (note that rate reduction cannot be compared across dimensionalities). When using reduced embeddings (dim = 2), fastText obtains higher rate reductions. This reflects its better alignment with the first level of biomedical terminologies. However, when using raw model embeddings, GloVe tends to obtain larger rate reduction.

When considering embeddings after dimensionality reduction, fastText obtains the largest rate reduction score for all categories (Table 2, d = 2), which reflects the better alignments of reduced fastText embeddings with the hierarchy of biomedical terminologies (Figure 4). For unreduced embeddings, while fastText achieves the largest rate reduction score for ICD10-CM codes, GloVe shows the largest scores for ICD10-PCS and ATC codes (Table 2, d = 512). This suggests that, if semantic information of medical concepts is accurately represented in the embedding space of GloVe, they are part of a more global and high-dimensional structure. This may have an impact on the quality of embeddings for prediction tasks (see section 3.2).

### 3.1.2 Hierarchical analysis

We assessed the ability of all models to uncover the hierarchical relationships among ICD10-CM, ICD10-PCS, and ATC codes. Specifically, we evaluated whether models' embeddings could be used to rediscover the second hierarchical level of medical terminologies. We focused on ICD10-CM codes beginning with C0 to D4, ICD10-PCS codes beginning with B0 to BY, and ATC codes beginning with L01 to L04. We generated empirical clusters from the reduced (2-dimensional) embedding vectors of these codes and compared them to theoretical clusters based on the second hierarchical level of the terminologies, namely the second character of ICD10-CM and ICD10-PCS codes, and the third character of ATC codes. We used the hdbscan algorithm [100] to compute the empirical clusters, either using raw embeddings or embeddings after t-SNE dimensionality reduction. Note that we used the number of theoretical clusters as prior knowledge when determining the clusters (i.e., we set a flat lambda value cutoff in the hdbscan cluster tree to obtain the same number of clusters as in the medical terminology). We measured the quality of the clusters generated by each model (Table 3).

|                     | Raw embeddings (d = 512) |          |       | Reduced embeddings (t-SNE, d = 2) |              |       |
|---------------------|--------------------------|----------|-------|-----------------------------------|--------------|-------|
|                     | word2vec                 | fastText | GloVe | word2vec                          | fastText     | GloVe |
|                     | <b>ICD10-CM codes</b>    |          |       |                                   |              |       |
| <b>Homogeneity</b>  | 0.032                    | 0.432    | 0.026 | 0.429                             | <b>0.880</b> | 0.202 |
| <b>Completeness</b> | 0.157                    | 0.602    | 0.124 | 0.475                             | <b>0.880</b> | 0.305 |
| <b>V-measure</b>    | 0.053                    | 0.503    | 0.044 | 0.451                             | <b>0.880</b> | 0.243 |
|                     | <b>ICD10-PCS codes</b>   |          |       |                                   |              |       |
| <b>Homogeneity</b>  | 0.173                    | 0.170    | NC    | 0.707                             | <b>0.773</b> | 0.281 |
| <b>Completeness</b> | 0.495                    | 0.387    | NC    | 0.750                             | <b>0.825</b> | 0.416 |
| <b>V-measure</b>    | 0.256                    | 0.236    | NC    | 0.728                             | <b>0.799</b> | 0.336 |
|                     | <b>ATC codes</b>         |          |       |                                   |              |       |
| <b>Homogeneity</b>  | NC                       | 0.524    | 0.022 | 0.288                             | <b>0.961</b> | 0.169 |
| <b>Completeness</b> | NC                       | 0.408    | 0.027 | 0.206                             | <b>0.873</b> | 0.158 |
| <b>V-measure</b>    | NC                       | 0.459    | 0.024 | 0.240                             | <b>0.915</b> | 0.163 |

**Table 3. Evaluation of empirical clusters as determined by model embeddings.** We quantified the homogeneity of empirical clusters and their match with theoretical clusters (completeness). V-measure is computed as the harmonic mean between homogeneity and completeness. NC: the clustering algorithm could not identify any cluster.

Reduced fastText embeddings consistently outperform other combinations when used to rediscover the second level of the hierarchy of biomedical terminologies. For this reason, we visualized theoretical clusters, as well as empirical clusters generated with this combination of model and dimensionality (Figure 5).

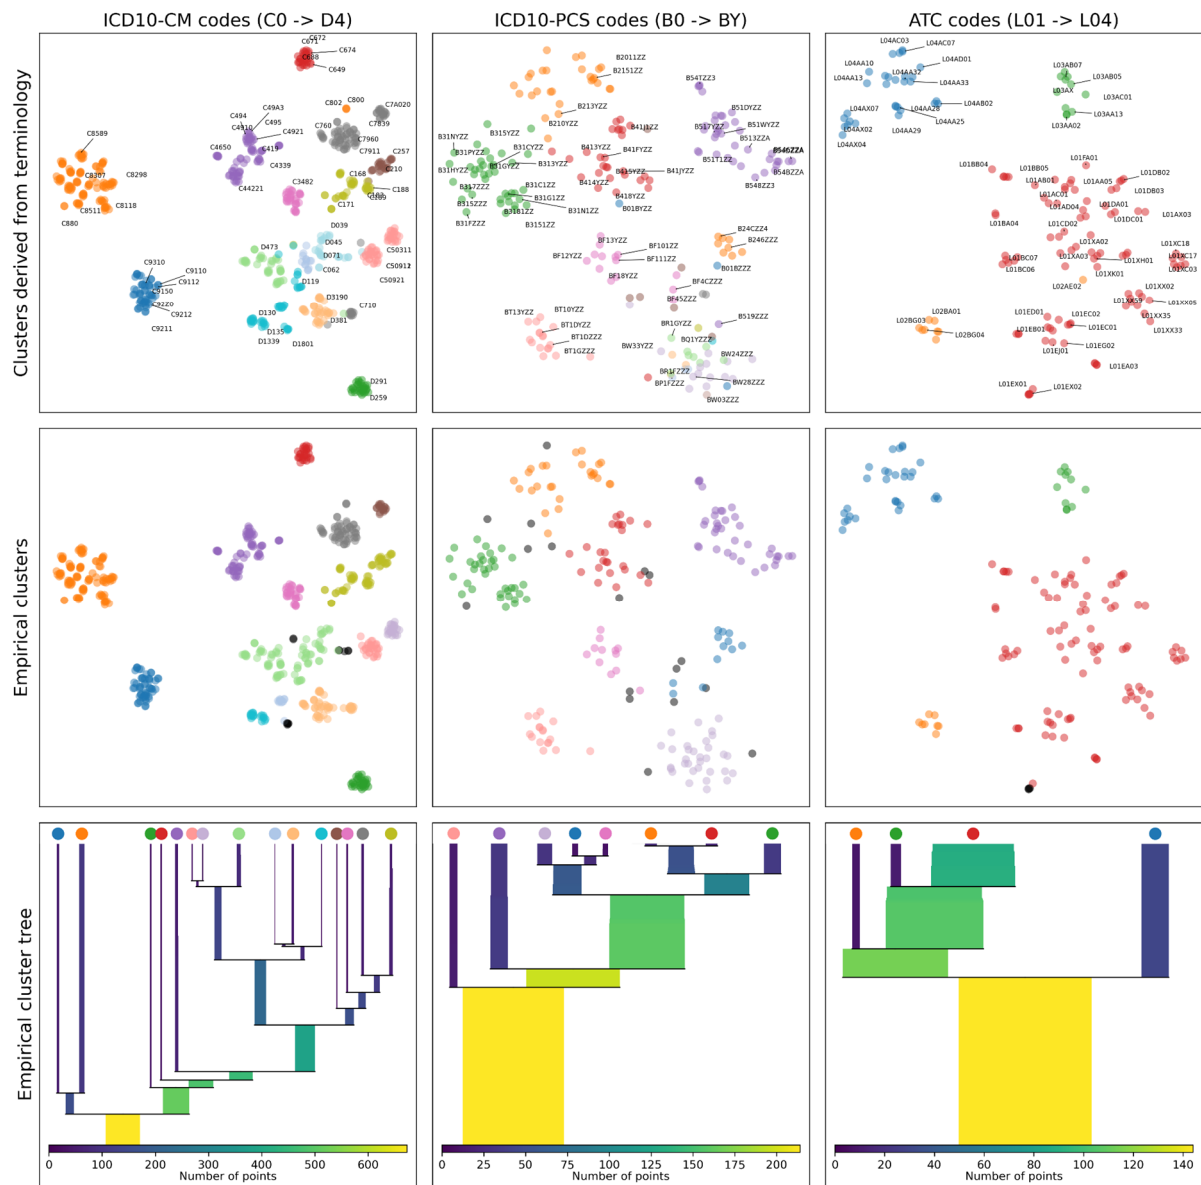

**Figure 5. Clusterization of a selected subset of medical concepts using fastText embeddings after dimensionality reduction (t-SNE, d = 2).** **Top.** Theoretical clusters. Samples are positioned following reduced embeddings. Colors are derived from the second hierarchical level of ICD10-CM, ICD10-PCS, and ATC codes. **Center.** Empirical clusters. Colors are assigned using the hdbSCAN clustering algorithm, and then aligned with the top row by maximizing the number of sample matches between theoretical and empirical clusters. Samples labeled with a black color were not assigned to any cluster (i.e., labeled as noise). **Bottom.** The empirical cluster trees were also generated with hdbSCAN. We cut the tree after the number of theoretical clusters was reached (i.e., 15 for ICD10-CM, 8 for ICD10-PCS and 4 for ATC codes). We added color patches that correspond to the empirical cluster in the center row.

The empirical clusters derived from fastText embeddings are generally well-aligned with the theoretical clusters. Still, empirical data proposes alternative ways of defining the terminology of medical codes by identifying new clusters. For example, procedure codes at the bottom-right of the diagram (Figure 5, center column, top vs. center row) form a well-defined group although the medical concepts belonging to that cluster come mainly from two different ICD10-PCS subgroups, namely BW (*anatomical regions*) and BR (*axial skeleton, except skull and facial bones*). Moreover, some singular medical concepts are moved to different clusters by empirical data. For example, for ATC codes, L02AE02 (*leuprorelin*) that belongs to the orange theoretical cluster (L02: *endocrine therapy*) is moved towards the blue empirical cluster (L01: *antineoplastic agents*) by empirical data, which is also a valid categorization of *leuprorelin*, i.e., an antineoplastic agent (Figure 5, top-right).

Also note that, for ICD10-CM codes, the way we defined theoretical groups (i.e., relying on the second code letter) includes inaccuracies. For example, the group *Malignant neoplasms of ill-defined, other secondary and unspecified sites* consists of ICD10-CM codes that start with C76 to C80, which include samples coming from both theoretical clusters C7 (gray) and C8 (orange). Empirical clusters correctly identified this issue (Figure 5, top-left, group of orange codes around the gray cluster), even though subword information should bias C80 tokens to be closer to other tokens starting with C8. Another example for ICD10-CM codes are the groups *malignant neoplasms of breast* (codes that start with C50) and *malignant neoplasms of female genital organs* (code that start with C51 to C58). Empirical embeddings correctly identified these two groups (Figure 5, center row, right column, mauve and salmon clusters on the right of the plot), even though they belong to the same theoretical cluster C5.

## 3.2 Prediction tasks

We computed the precision and recall of word2vec, fastText and GloVe based on the medical concepts that were close to each patient trajectory embedding. Note that model predictions are computed in a completely unsupervised way and are only used to compare the quality of the embeddings provided by the different models.

### 3.2.1 Length-of-stay, readmission, and mortality prediction

Figure 6 shows AUROC and AUPRC obtained with the embeddings of all models, when predicting outcomes from patient trajectories. Note that AUPRC is a better measure for prediction problems with unbalanced classes, which is the case here. Also note that P is the fraction of the tokens of each patient trajectory sequence given to the model as an input for prediction, increasing from  $P = 0.0$  (demographics tokens only) to  $P = 1.0$  (full trajectory). First, increasing the fraction of tokens given as input to the models always improves their prediction performance, for any model. However, fastText seems to benefit slightly less from more information about patient trajectories, as its performance peaks to lower values than what is obtained with word2vec and GloVe, even though they all start from similar baseline performances at  $P = 0.0$ .

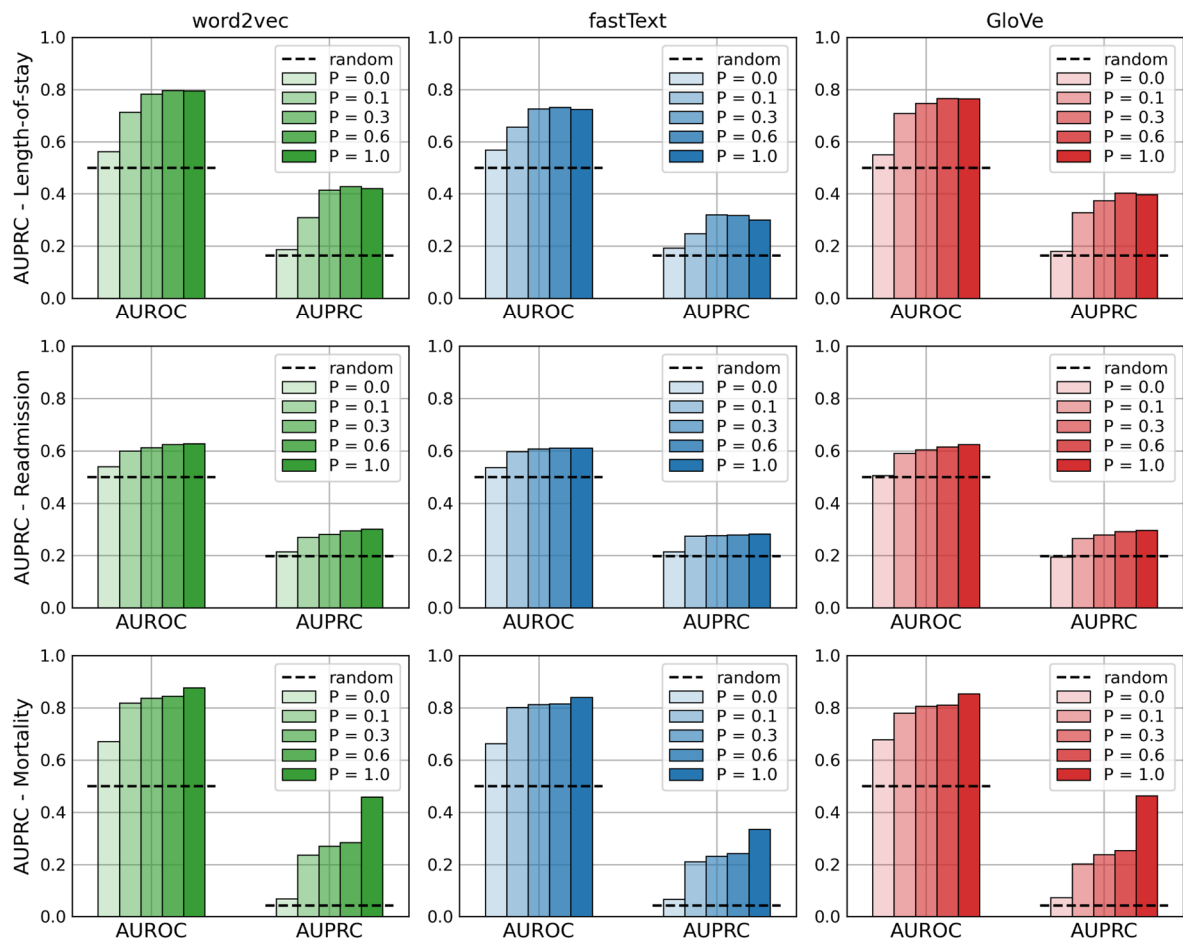

**Figure 6. AUROC and AUPRC obtained with word2vec, fastText and GloVe for outcome prediction tasks.** P stands for the different proportions of the patient stay tokens given as input to the models (see section 2.4). The random performance for AUPRC corresponds to the number of positive samples over the total number of samples.

### 3.2.2 Comparison of patient outcome embeddings

In Figure 7, we visualize patient trajectory embeddings for the different outcomes - length-of-stay, readmission, and mortality - to assess whether high-level outcome information is present in the local structure of embeddings. The patient trajectories were taken from the testing dataset and their embeddings were generated by removing the outcome label from the trajectory and averaging the remaining concept embeddings. The 2-dimensional representations were then obtained by applying the t-SNE algorithm for word2vec, fastText, and GloVe embeddings. To improve visualization, we used the same number of patient trajectories for each outcome, which were randomly sampled from the test set. The limiting factor was the smallest number of patients for any outcome in the testing dataset, which was 1800 (patients that passed away). Results show that patients with antagonistic outcomes, e.g., dead and alive patients, populate similar regions of the embedding space. This suggests that information relevant to predict outcomes might have been entangled during the dimensionality reduction, or during the averaging (from several clinical concepts to a single representation of the trajectory). Moreover, the distance between antagonistic outcome tokens themselves (Figure 7, large circles) seem to be very close to each other in some cases. For example, GloVe embeddings for any outcome token are almost at the same location in the embedding space.

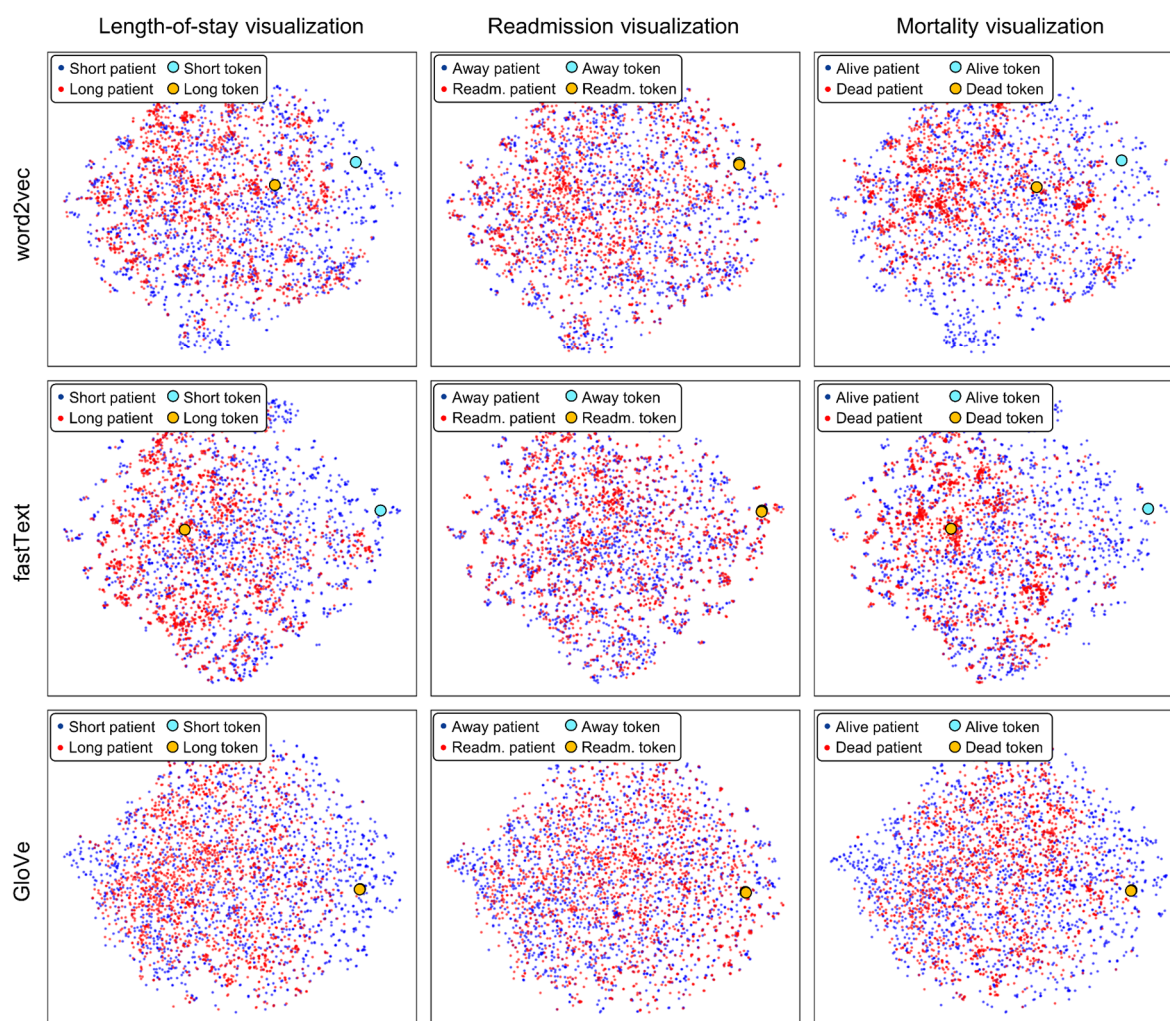

**Figure 7.** Visualization of patient trajectory embeddings for all combinations of different outcomes (length-of-stay, readmission, mortality) and models (word2vec, fastText, GloVe), after t-SNE dimensionality reduction. We also added the reduced embedding of outcome tokens (large circles). Dimensionality reduction was performed using the embeddings of all patient trajectories from the testing dataset, extended with the embeddings of all outcome tokens. Then, for each outcome label, 1800 trajectories were randomly sampled for visualization.

### 3.2.3 Diagnosis, procedure, and medication code prediction

Figure 8 shows the AUPRC obtained with the models when predicting all medical codes of a category given the patient trajectory embeddings (AUROC values are shown in Figure S1, Suppl. Inf.). First, word2vec has, in most cases, a lower score than fastText. It is stronger only for edge cases where performance is very low already. Second, GloVe obtains the best mean results amongst models. It is better than fastText for ICD10-CM codes prediction and obtains better performance for ICD10-PCS and ATC codes prediction when the task is more challenging (i.e., for less lenient matches). It should be noted that sometimes, the best performance is reached when only the demographic tokens are used to compute patient trajectory embeddings (i.e.,  $P = 0.0$ ; e.g., GloVe, 1 letter match, ICD10-CM or ATC codes prediction). This means that adding more tokens to the sentence worsens the alignment between patient trajectory embeddings and associated target code embeddings.



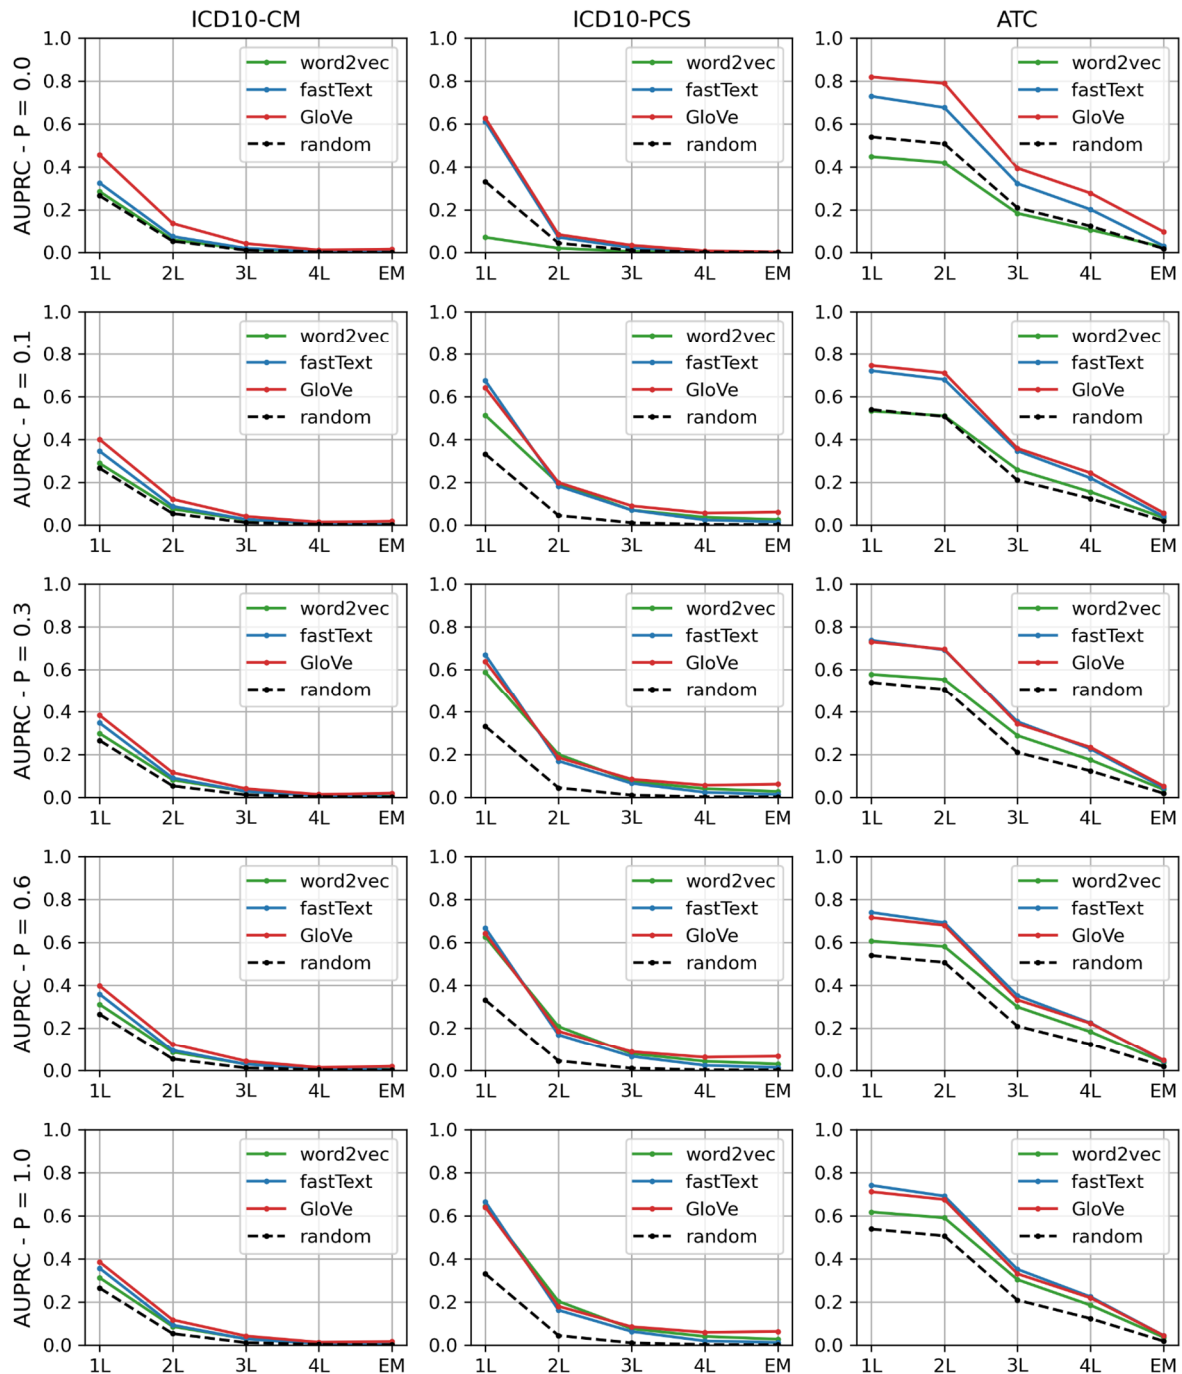

**Figure 8.** AUPRC obtained with word2vec, fastText and GloVe for medical concept prediction tasks. L stands for the lenient letter match. For example, 1L means that precision and recall were computed on the basis of the first letter of the codes only. EM means that an exact match was required between a model prediction and a target code. P stands for the different proportions of the patient trajectories given as input to the models (see section 2.4). The random performance corresponds to the number of positive samples over the total number of samples.

We also performed medical code prediction in different settings. For ICD10-CM codes, patient trajectory embeddings were used to predict only the most important diagnosis code (see Figure 1, p1), given the full patient trajectory from which all outcome and diagnosis tokens were removed. For ICD10-PCS and ATC codes, we used the embeddings of a patient’s trajectory, including events only up to a certain point in time, to predict the next occurring procedure or medication token. Figure 9 shows

AUPRC for these prediction tasks (AUROC values are shown in Figure S2, Suppl. Inf.). As we can notice, these tasks are very challenging for the three models assessed. The results differentiate from a random prediction only for the first and second code letters, while exact matching prediction is equivalent to a random prediction. We assume that this low performance is due to the lack of temporality information encoded by the embeddings, that is, they tend to learn hierarchical relationships among medical concepts but ignore their sequential relationship, which is trajectory dependent.

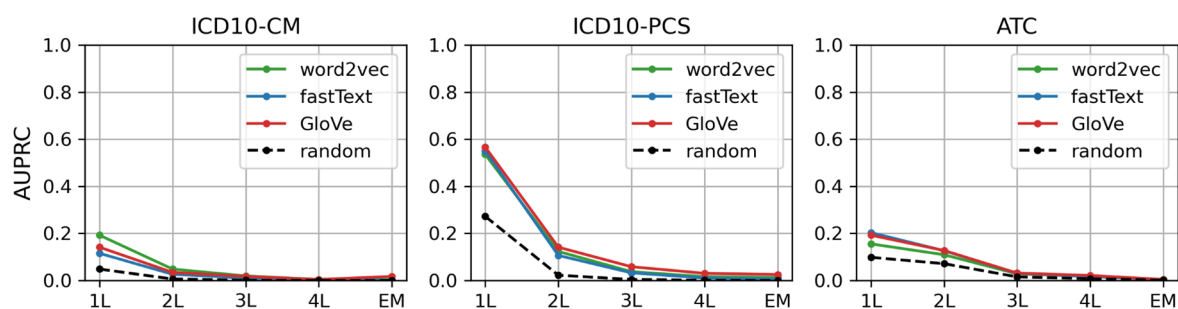

**Figure 9. AUPRC obtained with word2vec, fastText and GloVe for alternative prediction tasks.** We used model embeddings to predict the most important ICD10-CM code of the patient trajectory, as well as the next ICD10-PCS and ATC code, given the medical events that happened so far. L stands for the lenient letter match. For example, 1L means that precision and recall were computed on the basis of the first letter of the codes only. EM means that an exact match was required between a model prediction and a target code.

## 4. Discussion

In this study, we compared the ability of different language models, word2vec, fastText, and GloVe, to represent medical concepts by expressing patient trajectories as sequences of medical codes. We showed that language models can learn data-driven embeddings that retrieve the semantic meaning of medical concepts, as provided by biomedical terminologies. Using an unsupervised approach, we also compared the respective capabilities and limitations of different language models for patient trajectory prediction.

To evaluate the semantic content of embeddings as produced by the different language models, we compared their alignment with existing medical concept terminologies. Using rate reduction as a quantitative measurement, we showed that, in terms of low-level representation, fastText is the model whose embeddings are best aligned with the hierarchy of existing medical concept terminologies (Figure 4 and Table 2). Note that, in the case of fastText, subword information includes the hierarchical structure of medical terminologies. Indeed, some subwords of ICD10 and ATC codes correspond to their top-level categories. For instance, the subwords of the ICD10-CM code T3302XA (*superficial frostbite of nose, initial encounter*) include T33 (*superficial frostbite*) and T3302 (*superficial frostbite of nose*). However, most subword tokens are irrelevant, such as 02XA or 330 in the aforementioned example. Moreover, the hierarchy of medical terminologies does not strictly follow subword information. For example, medical concepts describing physical injuries consist of ICD10-CM codes that start with S00 to T34, and from T66 to T88, skipping codes that go from T35 to T65. Still, fastText embeddings are able to update prior subword knowledge and uncover the complex hierarchy of medical terminologies (Figure 4 and 5). This suggests that fastText is an efficient way of combining prior knowledge (included in subword information, which reflects existing terminologies) with data-driven representations (which depend on the history of patients at the ICUs).

We extrinsically evaluated the quality of the medical concept embeddings via outcome and trajectory prediction tasks using an unsupervised method. First, we performed a multi-label prediction task in which tokens belonging to one category (ICD10-CM, ICD10-PCS, or ATC codes) were detached from patient trajectories and used as target tokens. Patient trajectories were embedded using the language models (Figure 2) and compared to the embeddings of the target tokens using their cosine-similarity (Figure 3). In terms of multi-label prediction, GloVe tends to outperform fastText and word2vec, although not consistently and by a small margin (Figure 8, 9, S1 and S2, Suppl. Inf.). We suggest the reason for GloVe superiority for medical concept prediction tasks is that it considers long-range relationships, as it has no context window, and instead computes co-occurrences on whole sequences. This provides a more global scope to GloVe embeddings, which may be beneficial for high-level tasks such as medical concept prediction. It should be noted that this is also reflected in the rate reduction of raw embeddings (i.e.,  $d = 512$ ), for which GloVe obtains the largest values overall (Table 2, top). This means that, even though GloVe embeddings appear to have a low semantic agreement with medical terminologies after dimensionality reduction, they agree more than other models in the full-dimensional space. The t-SNE algorithm maps high-dimensional vectors to a low-dimensional space while preserving the local structure of the data but is not guaranteed to preserve the global structure of the representation. Hence, the visualization in Figure 4 only highlights the semantics of the low-level structure of embeddings. This suggests that, if semantic information of medical concepts is accurately

represented in the embedding space of GloVe, they are part of a more global and high-dimensional structure.

We also carried out a binary prediction task in which patient trajectory embeddings were compared to the embeddings of binary outcome tokens (length-of-stay, readmission, mortality) that were prepended to each patient trajectory during training. As for the multi-label prediction tasks, we used an unsupervised method to generate predictions, which were computed as the outcome tokens that were more similar to the patient trajectory embeddings. First and foremost, achieved performance levels for any model are considerably low, with most AUPRC measurements rarely exceeding a value of 0.4. This was to expect given the simplicity of our unsupervised prediction method, as compared to the target outcomes which inherently depend both on global trajectory patterns and on nuanced interactions between medical concepts. Moreover, pooling all tokens together when building patient trajectory embeddings is likely suboptimal for capturing the rich, dynamic information contained in patient trajectories. A supervised method would probably be more suited to perform outcome predictions. This is reflected in Figure 7, where we visualized patient trajectory embeddings for different outcomes. These should ideally span contrasting regions of the embedding space, but actually present a large degree of overlap (at least in the reduced embeddings space). Besides, outcome tokens themselves tend to be very similar to each other, which might be a byproduct of prepending them to each patient trajectory during training, since they always appear in similar contexts.

Nevertheless, the binary outcome prediction task was used as a comparative evaluation method of model embeddings and their potential for more complex and high-level tasks. From our analysis, we found that word2vec and GloVe have similar performance levels, while they both consistently outperform fastText (Figure 6). We suggest that the cause of this discrepancy lies in fastText's intrinsic modeling of the hierarchical structure of medical terminologies. While this feature benefits fastText in the semantic alignment of its embeddings with existing medical terminologies, it seems to hinder the model in more high-level tasks, such as clinical outcome prediction. This task requires a broad and flexible representation of medical concepts and may be disrupted by fastText's stricter adherence to the hierarchy of biomedical terminologies. This underlines the importance of understanding the specific strengths and weaknesses of each model in relation to the nature of the task at hand.

This study has several limitations. First, we focused only on methods that produce static embeddings. However, more modern language models, such as those based on attention, provide contextualized embeddings, which usually improve performance in downstream tasks [101, 102]. In this case, instead of having a unique representation, clinical concepts have many according to the context in which they appear. Contextualized representation would thus require a different clustering and concept mapping methodology and should be a subject of further study. Second, for all prediction tasks that we used to evaluate model embeddings, no supervision was involved. While supervised learning tends to improve upon unsupervised methods, our goal here was to compare the quality of the extracted embeddings rather than devise an optimal trajectory prediction method. In that sense, we argue that the unsupervised methodology provides a less biased comparison, as it is independent of the learning model. A supervised methodology based on the proposed embedding strategy could also be a topic for further research and would benefit from the results presented in the current study. Third, due to the lack of explicitly time-stamped information for diagnosis codes, i.e., clinical evaluation time instead of billing time, we used the diagnosis priority to order these codes in the patient trajectory. As patients tend to have a recoverable condition before ICU admission, these codes were inserted early during the

original patient trajectory sequence generation. However, this may not necessarily always reflect the actual trajectory, as new diagnosis codes can be assigned to a patient during the ICU stay [103]. Finally, there may exist 1-to-1 relationships between medical concepts, e.g., an antiretroviral therapy might be specific to HIV/AIDS patients. Hence, for the ICD10-CM, ICD10-PCS and ATC code prediction tasks, there might be some leakage from input to target tokens. Nevertheless, given the limited performance of the predictions, we assume that this effect is negligible, especially due to the n:m relation between the dimensions.

## 5. Conclusion

We assessed the capabilities of different language models (word2vec, fastText, and GloVe), each coming with their own set of hypotheses, in expressing patient trajectories as sequences of medical codes. We found that these models can indeed learn data-driven embeddings that capture the semantic meaning of medical concepts. However, the effectiveness of these models varies based on the task at hand. While fastText aligns well with existing medical terminologies thanks to subword information, GloVe is more useful for medical concept prediction tasks thanks to its ability to consider long-range relationships and global co-occurrences in text. These results offer important insights for supervised medical concepts and clinical outcomes prediction methods and open up several exciting avenues for future exploration. One promising research avenue is refining strategies for encoding subword information for representing medical concepts. For instance, tokenization that aligns with ICD10 and ATC hierarchies, instead of relying on basic n-grams, could enhance the accuracy and depth of the embeddings by providing crucial prior knowledge. Besides, it would reduce vocabulary sizes, thus optimizing model performance and efficiency. In conclusion, our study confirms the potential of language models in healthcare data analysis, particularly in understanding patient trajectories in intensive care.

## Funding statement

This work was funded by the Innosuisse - Schweizerische Agentur für Innovationsförderung - project no.: 55441.1 IP ICT.

## References

1. Meystre SM, Lovis C, Bürkle T, Tognola G, Budrionis A, Lehmann CU (2017) Clinical data reuse or secondary use: current status and potential future progress. *Yearbook of medical informatics* 26:38–52
2. O'malley KJ, Cook KF, Price MD, Wildes KR, Hurdle JF, Ashton CM (2005) Measuring diagnoses: ICD code accuracy. *Health services research* 40:1620–1639
3. McGinnis JM, Stuckhardt L, Saunders R, Smith M (2013) Best care at lower cost: the path to continuously learning health care in America.
4. Project HC and U (2016) Clinical classifications software (CCS) for ICD-9-CM.
5. Jensen PB, Jensen LJ, Brunak S (2012) Mining electronic health records: towards better research applications and clinical care. *Nature Reviews Genetics* 13:395–405
6. Furukawa MF, Eldridge N, Wang Y, Metersky M (2020) Electronic health record adoption and rates of in-hospital adverse events. *Journal of patient safety* 16:137–142
7. Melton GB, Hripcsak G (2005) Automated detection of adverse events using natural language processing of discharge summaries. *Journal of the American Medical Informatics Association* 12:448–457
8. Bean DM, Wu H, Iqbal E, Dzahini O, Ibrahim ZM, Broadbent M, Stewart R, Dobson RJ (2017) Knowledge graph prediction of unknown adverse drug reactions and validation in electronic health records. *Scientific reports* 7:1–11
9. Bruland P, McGilchrist M, Zapletal E, Acosta D, Proeve J, Askin S, Ganslandt T, Doods J, Dugas M (2016) Common data elements for secondary use of electronic health record data for clinical trial execution and serious adverse event reporting. *BMC medical research methodology* 16:1–10
10. Edwards ST, Neri PM, Volk LA, Schiff GD, Bates DW (2014) Association of note quality and quality of care: a cross-sectional study. *BMJ quality & safety* 23:406–413
11. Bell SK, Folcarelli PH, Anselmo MK, Crotty BH, Flier LA, Walker J (2015) Connecting patients and clinicians: the anticipated effects of open notes on patient safety and quality of care. *Joint Commission Journal on Quality and Patient Safety* 41:378–384
12. Kutney-Lee A, Kelly D (2011) The effect of hospital electronic health record adoption on nurse-assessed quality of care and patient safety. *The Journal of nursing administration* 41:466
13. Spiranovic C, Matthews A, Scanlan J, Kirkby KC (2016) Increasing knowledge of mental illness through secondary research of electronic health records: opportunities and challenges. *Advances in Mental Health* 14:14–25
14. Pathak J, Kho AN, Denny JC (2013) Electronic health records-driven phenotyping: challenges, recent advances, and perspectives. *Journal of the American Medical Informatics Association* 20:e206–e211
15. Shivade C, Raghavan P, Fosler-Lussier E, Embi PJ, Elhadad N, Johnson SB, Lai AM (2014) A review of approaches to identifying patient phenotype cohorts using electronic health records. *Journal of the American Medical Informatics Association* 21:221–230
16. Oellrich A, Collier N, Groza T, Rebholz-Schuhmann D, Shah N, Bodenreider O, Boland MR, Georgiev I, Liu H, Livingston K (2016) The digital revolution in phenotyping. *Briefings in bioinformatics* 17:819–830
17. Austin PC, Tu JV, Ho JE, Levy D, Lee DS (2013) Using methods from the data-mining and machine-learning literature for disease classification and prediction: a case study examining classification of heart failure subtypes. *Journal of clinical epidemiology* 66:398–407
18. Wei W-Q, Denny JC (2015) Extracting research-quality phenotypes from electronic health records to support precision medicine. *Genome medicine* 7:1–14
19. Ananthakrishnan AN, Cagan A, Cai T, Gainer VS, Shaw SY, Savova G, Churchill S, Karlson EW, Murphy SN, Liao KP (2016) Identification of nonresponse to treatment using narrative data in an electronic health record inflammatory bowel disease cohort. *Inflammatory bowel diseases* 22:151–158
20. Ebadollahi S, Sun J, Gotz D, Hu J, Sow D, Neti C (2010) Predicting patient's trajectory of physiological data using temporal trends in similar patients: a system for near-term prognostics. In: *AMIA annual symposium proceedings*. American Medical Informatics Association, p 192
21. Pinaire J, Azé J, Bringay S, Landais P (2017) Patient healthcare trajectory. An essential monitoring tool: a systematic review. *Health information science and systems* 5:1–18
22. Pham T, Tran T, Phung D, Venkatesh S (2017) Predicting healthcare trajectories from medical records: A deep learning approach. *Journal of biomedical informatics* 69:218–229
23. Romano MJ, Stafford RS (2011) Electronic health records and clinical decision support systems: impact on national ambulatory care quality. *Archives of internal medicine* 171:897–903
24. Zhao D, Weng C (2011) Combining PubMed knowledge and EHR data to develop a weighted bayesian network for pancreatic cancer prediction. *Journal of biomedical informatics* 44:859–868
25. Kuperman GJ, Bobb A, Payne TH, Avery AJ, Gandhi TK, Burns G, Classen DC, Bates DW (2007) Medication-related clinical decision support in computerized provider order entry systems: a review. *Journal of the*



- American Medical Informatics Association 14:29–40
26. Cai X, Perez-Concha O, Coiera E, Martin-Sanchez F, Day R, Roffe D, Gallego B (2016) Real-time prediction of mortality, readmission, and length of stay using electronic health record data. *Journal of the American Medical Informatics Association* 23:553–561
  27. Tabak YP, Sun X, Nunez CM, Johannes RS (2014) Using electronic health record data to develop inpatient mortality predictive model: Acute Laboratory Risk of Mortality Score (ALaRMS). *Journal of the American Medical Informatics Association* 21:455–463
  28. Lee J, Maslove DM, Dubin JA (2015) Personalized mortality prediction driven by electronic medical data and a patient similarity metric. *PloS one* 10:e0127428
  29. Raghupathi W, Raghupathi V (2014) Big data analytics in healthcare: promise and potential. *Health information science and systems* 2:1–10
  30. Yadav P, Steinbach M, Kumar V, Simon G (2018) Mining electronic health records (EHRs) A survey. *ACM Computing Surveys (CSUR)* 50:1–40
  31. Critical Data MIT (2016) Secondary analysis of electronic health records. Springer Nature
  32. Gaudet-Blavignac C, Raisaro JL, Touré V, Österle S, Cramer K, Lovis C (2021) A national, semantic-driven, three-pillar strategy to enable health data secondary usage interoperability for research within the swiss personalized health network: Methodological study. *JMIR Medical Informatics* 9:e27591
  33. Teodoro D, Choquet R, Schober D, Mels G, Pasche E, Ruch P, Lovis C (2011) Interoperability driven integration of biomedical data sources. *Studies in health technology and informatics* 169:185–9
  34. Cunningham JA, Van Speybroeck M, Kalra D, Verbeeck R (2016) Nine principles of semantic harmonization. In: *AMIA Annual Symposium Proceedings*. American Medical Informatics Association, p 451
  35. Goble C, Stevens R (2008) State of the nation in data integration for bioinformatics. *Journal of biomedical informatics* 41:687–693
  36. Hodge GM (2000) Systems of knowledge organization for digital libraries: beyond traditional authority files. Digital Library Federation
  37. Organization WH (2004) International Statistical Classification of Diseases and related health problems: Alphabetical index. World Health Organization
  38. WHOCC - ATC/DDD Index. <https://www.who.int/tools/atc-ddd-toolkit/atc-classification>. Accessed 26 Mar 2023
  39. SNOMED CT. <https://www.nlm.nih.gov/healthit/snomedct/index.html>. Accessed 26 Mar 2023
  40. Lee CH, Yoon H-J (2017) Medical big data: promise and challenges. *Kidney research and clinical practice* 36:3
  41. Adnan K, Akbar R, Khor SW, Ali ABA (2020) Role and challenges of unstructured big data in healthcare. *Data Management, Analytics and Innovation: Proceedings of ICDMAI 2019, Volume 1* 301–323
  42. Obermeyer Z, Emanuel EJ (2016) Predicting the future—big data, machine learning, and clinical medicine. *The New England journal of medicine* 375:1216
  43. Pfaff ER, Madlock-Brown C, Baratta JM, Bhatia A, Davis H, Girvin A, Hill E, Kelly E, Kostka K, Loomba J (2023) Coding long COVID: characterizing a new disease through an ICD-10 lens. *BMC medicine* 21:1–13
  44. Si Y, Du J, Li Z, Jiang X, Miller T, Wang F, Zheng WJ, Roberts K (2021) Deep representation learning of patient data from Electronic Health Records (EHR): A systematic review. *Journal of Biomedical Informatics* 115:103671
  45. Choi E, Bahadori MT, Schuetz A, Stewart WF, Sun J (2016) Doctor ai: Predicting clinical events via recurrent neural networks. In: *Machine learning for healthcare conference*. PMLR, pp 301–318
  46. Choi E, Bahadori MT, Song L, Stewart WF, Sun J (2017) GRAM: graph-based attention model for healthcare representation learning. In: *Proceedings of the 23rd ACM SIGKDD international conference on knowledge discovery and data mining*. pp 787–795
  47. Choi E, Xu Z, Li Y, Dusenberry M, Flores G, Xue E, Dai A (2020) Learning the graphical structure of electronic health records with graph convolutional transformer. In: *Proceedings of the AAAI conference on artificial intelligence*. pp 606–613
  48. Miotto R, Wang F, Wang S, Jiang X, Dudley JT (2018) Deep learning for healthcare: review, opportunities and challenges. *Briefings in bioinformatics* 19:1236–1246
  49. Shickel B, Tighe PJ, Bihorac A, Rashidi P (2017) Deep EHR: a survey of recent advances in deep learning techniques for electronic health record (EHR) analysis. *IEEE journal of biomedical and health informatics* 22:1589–1604
  50. Xiao C, Choi E, Sun J (2018) Opportunities and challenges in developing deep learning models using electronic health records data: a systematic review. *Journal of the American Medical Informatics Association* 25:1419–1428
  51. Egger J, Gsxner C, Pepe A, Pomykala KL, Jonske F, Kurz M, Li J, Kleesiek J (2022) Medical deep learning—a systematic meta-review. *Computer methods and programs in biomedicine* 106874
  52. Lipton ZC, Kale DC, Elkan C, Wetzel R (2015) Learning to diagnose with LSTM recurrent neural networks. *arXiv preprint arXiv:1511.03677*
  53. Song H, Rajan D, Thiagarajan J, Spanias A (2018) Attend and diagnose: Clinical time series analysis using attention models. *Proceedings of the AAAI conference on artificial intelligence* 32:

54. Choi E, Bahadori MT, Sun J, Kulas J, Schuetz A, Stewart W (2016) Retain: An interpretable predictive model for healthcare using reverse time attention mechanism. *Advances in neural information processing systems* 29:
55. Nguyen P, Tran T, Wickramasinghe N, Venkatesh S (2016)  $\text{\$}\backslash\text{\mathtt{t}}\text{\$}$ : a convolutional net for medical records. *IEEE journal of biomedical and health informatics* 21:22–30
56. Cheng Y, Wang F, Zhang P, Hu J (2016) Risk prediction with electronic health records: A deep learning approach. In: *Proceedings of the 2016 SIAM international conference on data mining*. SIAM, pp 432–440
57. Nori VS, Hane CA, Sun Y, Crown WH, Bleicher PA (2020) Deep neural network models for identifying incident dementia using claims and EHR datasets. *Plos one* 15:e0236400
58. Gunasekar S, Ho JC, Ghosh J, Kreml S, Kho AN, Denny JC, Malin BA, Sun J (2016) Phenotyping using Structured Collective Matrix Factorization of Multi--source EHR Data. *arXiv preprint arXiv:1609.04466*
59. Ni Y, Bachtel A, Nause K, Beal S (2021) Automated detection of substance use information from electronic health records for a pediatric population. *Journal of the American Medical Informatics Association* 28:2116–2127
60. Eisman AS, Shah NR, Eickhoff C, Zerveas G, Chen ES, Wu W-C, Sarkar IN (2020) Extracting angina symptoms from clinical notes using pre-trained transformer architectures. In: *AMIA Annual Symposium Proceedings*. American Medical Informatics Association, p 412
61. Gehrman S, Deroncourt F, Li Y, Carlson ET, Wu JT, Welt J, Foote Jr J, Moseley ET, Grant DW, Tyler PD (2018) Comparing deep learning and concept extraction based methods for patient phenotyping from clinical narratives. *PloS one* 13:e0192360
62. Wei Q, Ji Z, Li Z, Du J, Wang J, Xu J, Xiang Y, Tiryaki F, Wu S, Zhang Y (2020) A study of deep learning approaches for medication and adverse drug event extraction from clinical text. *Journal of the American Medical Informatics Association* 27:13–21
63. Pivovarov R, Perotte AJ, Grave E, Angiolillo J, Wiggins CH, Elhadad N (2015) Learning probabilistic phenotypes from heterogeneous EHR data. *Journal of biomedical informatics* 58:156–165
64. Ferté T, Cossin S, Schaeveerbeke T, Barnette T, Jouhet V, Hejblum BP (2021) Automatic phenotyping of electronic health record: PheVis algorithm. *Journal of Biomedical Informatics* 117:103746
65. Ahuja Y, Zou Y, Verma A, Buckeridge D, Li Y (2022) MixEHR-Guided: A guided multi-modal topic modeling approach for large-scale automatic phenotyping using the electronic health record. *Journal of biomedical informatics* 134:104190
66. Kapoor A, Ben X, Liu L, Perozzi B, Barnes M, Blais M, O'Banion S (2020) Examining covid-19 forecasting using spatio-temporal graph neural networks. *arXiv preprint arXiv:2007.03113*
67. Lybarger K, Ostendorf M, Thompson M, Yetisgen M (2021) Extracting COVID-19 diagnoses and symptoms from clinical text: A new annotated corpus and neural event extraction framework. *Journal of Biomedical Informatics* 117:103761
68. Delijewski M, Haneczok J (2021) AI drug discovery screening for COVID-19 reveals zafirlukast as a repurposing candidate. *Medicine in Drug Discovery* 9:100077
69. Zhou Y, Wang F, Tang J, Nussinov R, Cheng F (2020) Artificial intelligence in COVID-19 drug repurposing. *The Lancet Digital Health* 2:e667–e676
70. Muñoz AA, Carro EU, Santamaría LP, Carrasco BO, Ruiz EM, Gallardo YP, Rodríguez-Gonzalez A (2022) REDIRECTION: Generating drug repurposing hypotheses using link prediction with DISNET data. In: *2022 IEEE 35th International Symposium on Computer-Based Medical Systems (CBMS)*. IEEE, pp 7–12
71. Santamaría LP, Uzquiano MD, Carro EU, Ortiz-Roldán N, Gallardo YP, Rodríguez-González A (2021) Integrating heterogeneous data to facilitate COVID-19 drug repurposing. *Drug Discovery Today*
72. Obeid JS, Davis M, Turner M, Meystre SM, Heider PM, O'Bryan EC, Lenert LA (2020) An artificial intelligence approach to COVID-19 infection risk assessment in virtual visits: A case report. *Journal of the American Medical Informatics Association* 27:1321–1325
73. Wanyan T, Honarvar H, Jaladanki SK, Zang C, Naik N, Somani S, De Freitas JK, Paranjpe I, Vaid A, Zhang J (2021) Contrastive learning improves critical event prediction in COVID-19 patients. *Patterns* 2:100389
74. Schwab P, Mehrjou A, Parbhoo S, Celi LA, Hetzel J, Hofer M, Schölkopf B, Bauer S (2021) Real-time prediction of COVID-19 related mortality using electronic health records. *Nature communications* 12:1058
75. Bai T, Chanda AK, Egleston BL, Vucetic S (2018) EHR phenotyping via jointly embedding medical concepts and words into a unified vector space. *BMC medical informatics and decision making* 18:15–25
76. Zhu Z, Yin C, Qian B, Cheng Y, Wei J, Wang F (2016) Measuring patient similarities via a deep architecture with medical concept embedding. In: *2016 IEEE 16th International Conference on Data Mining (ICDM)*. IEEE, pp 749–758
77. Amunategui M, Markwell T, Rozenfeld Y (2015) Prediction using note text: Synthetic feature creation with word2vec. *arXiv preprint arXiv:1503.05123*
78. Turner CA, Jacobs AD, Marques CK, Oates JC, Kamen DL, Anderson PE, Obeid JS (2017) Word2Vec inversion and traditional text classifiers for phenotyping lupus. *BMC medical informatics and decision making* 17:1–11
79. Jaume-Santero F, Zhang B, Proios D, Yazdani A, Gouareb R, Bjelogrić M, Teodoro D (2022) Cluster Analysis of

- Low-Dimensional Medical Concept Representations from Electronic Health Records. In: Health Information Science: 11th International Conference, HIS 2022, Virtual Event, October 28–30, 2022, Proceedings. Springer, pp 313–324
80. Steinberg E, Jung K, Fries JA, Corbin CK, Pfohl SR, Shah NH (2021) Language models are an effective representation learning technique for electronic health record data. *Journal of biomedical informatics* 113:103637
  81. Choi E, Xiao C, Stewart W, Sun J (2018) Mime: Multilevel medical embedding of electronic health records for predictive healthcare. *Advances in neural information processing systems* 31:
  82. Li Y, Rao S, Solares JRA, Hassaine A, Ramakrishnan R, Canoy D, Zhu Y, Rahimi K, Salimi-Khorshidi G (2020) BEHRT: transformer for electronic health records. *Scientific reports* 10:1–12
  83. Rasmy L, Xiang Y, Xie Z, Tao C, Zhi D (2021) Med-BERT: pretrained contextualized embeddings on large-scale structured electronic health records for disease prediction. *NPJ digital medicine* 4:86
  84. Mikolov T, Chen K, Corrado G, Dean J (2013) Efficient estimation of word representations in vector space. arXiv preprint arXiv:1301.3781
  85. Joulin A, Grave E, Bojanowski P, Mikolov T (2016) Bag of tricks for efficient text classification. arXiv preprint arXiv:1607.01759
  86. Bojanowski P, Grave E, Joulin A, Mikolov T (2017) Enriching word vectors with subword information. *Transactions of the association for computational linguistics* 5:135–146
  87. Pennington J, Socher R, Manning CD (2014) Glove: Global vectors for word representation. In: Proceedings of the 2014 conference on empirical methods in natural language processing (EMNLP). pp 1532–1543
  88. Beam AL, Kompa B, Schmaltz A, Fried I, Weber G, Palmer N, Shi X, Cai T, Kohane IS (2019) Clinical concept embeddings learned from massive sources of multimodal medical data. In: Pacific Symposium on Biocomputing 2020. World Scientific, pp 295–306
  89. Huang J, Xu K, Vydiswaran VV (2016) Analyzing multiple medical corpora using word embedding. In: 2016 IEEE International Conference on Healthcare Informatics (ICHI). IEEE, pp 527–533
  90. Wang Y, Liu S, Afzal N, Rastegar-Mojarad M, Wang L, Shen F, Kingsbury P, Liu H (2018) A comparison of word embeddings for the biomedical natural language processing. *Journal of biomedical informatics* 87:12–20
  91. Dynomant E, Lelong R, Dahamna B, Massonnaud C, Kerdelhué G, Grosjean J, Canu S, Darmoni SJ (2019) Word embedding for the French natural language in health care: comparative study. *JMIR medical informatics* 7:e12310
  92. Johnson AE, Bulgarelli L, Shen L, Gayles A, Shammout A, Horng S, Pollard TJ, Moody B, Gow B, Lehman LH (2023) MIMIC-IV, a freely accessible electronic health record dataset. *Scientific data* 10:1
  93. Kury FS, Bodenreider O (2017) Mapping US FDA National Drug Codes to Anatomical-Therapeutic-Chemical Classes using RxNorm. *AMIA*
  94. Nelson SJ, Zeng K, Kilbourne J, Powell T, Moore R (2011) Normalized names for clinical drugs: RxNorm at 6 years. *Journal of the American Medical Informatics Association* 18:441–448
  95. Mikolov T, Sutskever I, Chen K, Corrado GS, Dean J (2013) Distributed representations of words and phrases and their compositionality. *Advances in neural information processing systems* 26:
  96. Van der Maaten L, Hinton G (2008) Visualizing data using t-SNE. *Journal of machine learning research* 9:
  97. Pedregosa F, Varoquaux G, Gramfort A, Michel V, Thirion B, Grisel O, Blondel M, Prettenhofer P, Weiss R, Dubourg V (2011) Scikit-learn: Machine learning in Python. *the Journal of machine Learning research* 12:2825–2830
  98. Ma Y, Tsao D, Shum H-Y (2022) On the principles of parsimony and self-consistency for the emergence of intelligence. *Frontiers of Information Technology & Electronic Engineering* 23:1298–1323
  99. Chan KHR, Yu Y, You C, Qi H, Wright J, Ma Y (2022) ReduNet: A white-box deep network from the principle of maximizing rate reduction. *The Journal of Machine Learning Research* 23:4907–5009
  100. McInnes L, Healy J, Astels S (2017) hdbSCAN: Hierarchical density based clustering. *J Open Source Softw* 2:205
  101. Hur K, Lee J, Oh J, Price W, Kim Y, Choi E (2022) Unifying Heterogeneous Electronic Health Records Systems via Text-Based Code Embedding. In: Conference on Health, Inference, and Learning. PMLR, pp 183–203
  102. Hur K, Oh J, Kim J, Kim J, Lee MJ, Cho E, Moon S-E, Kim Y-H, Choi E (2022) UniHPF: Universal Healthcare Predictive Framework with Zero Domain Knowledge. arXiv preprint arXiv:2211.08082
  103. Smith G, Nielsen M (1999) Criteria for admission. *Bmj* 318:1544–1547
